# Supplementary material
Source: PubMed Central journal article supplement (PMC3686474)
Supplement: NIHMS473141-supplement-Supplementary_Figs___Tables.pdf [file NIHMS473141-supplement-Supplementary_Figs___Tables.pdf]

**Supplementary Figure 1: *tb1* locus teosinte recombinant chromosomes.** The horizontal axis represents the *tb1* genomic region to scale. Base-pair positions are relative to AGPv2 position 265,745,977 of the maize reference genome sequence. The *tb1* ORF as well as the nearest upstream predicted gene (PG3) are shown. The previously defined control region (CR) is shown in red, and is divided into its proximal and distal components. Thick black lines represent teosinte chromosome segments and narrow lines represent maize chromosome segments. Introgression lines with blue background shading were developed and described previously. Introgression lines with red background shading were developed during the course of this study.

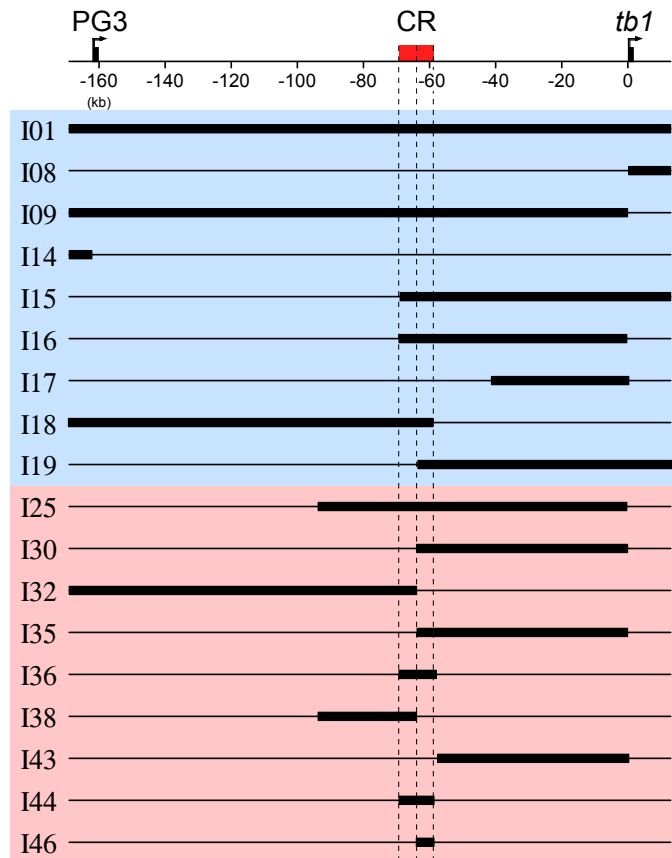

**Supplementary Figure 2: Phenotypic additive effects for the smallest introgression segments.**

Three introgression segments are compared. These introgression segments include the full control region (I44), the proximal component only (I46), and the distal component only (I38). The length of each introgressed segment is included for the both the corresponding maize and teosinte alleles. The size of the introgression segments vary between maize and teosinte because of insertion/deletion polymorphisms. Additive effects for each of the introgression segments are shown with standard errors. These effects highlight the independent phenotypic contribution of both the proximal and distal components of the control region (CR).

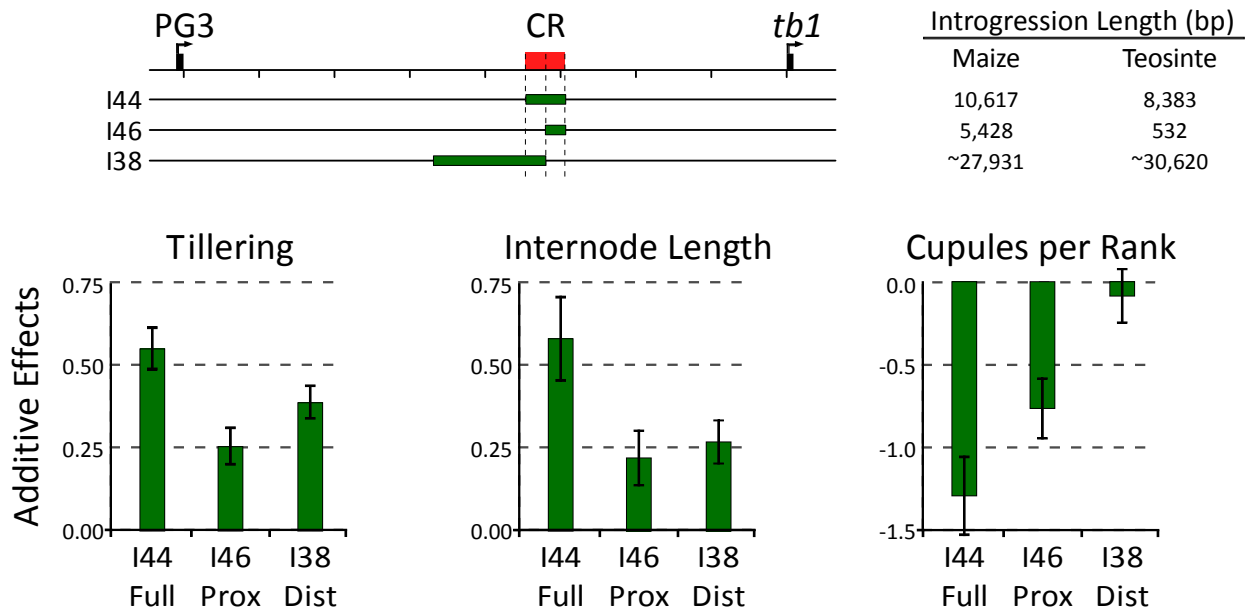

**Supplementary Table 1.** AGPv2 position of introgression line crossovers.

| Introgression | 5' Crossover              | 3' Crossover              |
|---------------|---------------------------|---------------------------|
| I01           | 197,055,807 – 214,414,551 | 273,901,402 – 275,036,633 |
| I08           | 265,745,913 – 265,746,221 | 273,901,402 – 275,036,633 |
| I09           | 197,055,807 – 214,414,551 | 265,745,913 – 265,746,221 |
| I14           | 197,055,807 – 214,414,551 | 265,591,417 – 265,592,617 |
| I15           | 265,676,915 – 265,677,031 | 273,901,402 – 275,036,633 |
| I16           | 265,676,590 – 265,676,675 | 265,746,271 – 265,746,677 |
| I17           | 265,703,969 – 265,705,220 | 265,746,271 – 265,746,677 |
| I18           | 197,055,807 – 214,414,551 | 265,687,315 – 265,687,481 |
| I19           | 265,682,026 – 265,682,152 | 273,901,402 – 275,036,633 |
| I25           | 265,652,617 – 265,676,590 | 265,746,271 – 265,746,677 |
| I30           | 265,681,922 – 265,681,988 | 265,745,913 – 265,746,221 |
| I32           | 197,055,807 – 214,414,551 | 265,682,026 – 265,682,152 |
| I35           | 265,682,026 – 265,682,152 | 265,745,913 – 265,746,221 |
| I36           | 265,676,915 – 265,676,675 | 265,687,961 – 265,687,993 |
| I38           | 265,652,617 – 265,676,590 | 265,682,026 – 265,682,152 |
| I43           | 265,688,376 – 265,688,411 | 265,746,271 – 265,746,677 |
| I44           | 265,676,682 – 265,676,732 | 265,687,315 – 265,687,481 |
| I46           | 265,681,598 – 265,681,922 | 265,687,315 – 265,687,481 |

**Supplementary Table 2.** Primer sequences of markers used for genotyping and detecting transposon insertions.

| <b>a.</b> | <b>Primer Name</b> | <b>Primer Sequence (5' to 3')</b> | <b>AGPv2 Position</b>     |
|-----------|--------------------|-----------------------------------|---------------------------|
|           | GS1-F              | ACACCGCCACCGACATCT                | 265,591,673 – 265,591,691 |
|           | GS1-R              | TTGTCCCTGAACGGCCAATA              | 265,591,225 – 265,591,246 |
|           | GS2-F              | TGGCCAATAAATGTACTAGGTCAC          | 265,745,428 – 265,745,452 |
|           | GS2-R              | TGATCATACCACCTCTCTATGCAG          | 265,745,748 – 265,745,771 |
|           | GS3-F              | CATGAACATGCCGTGTGCT               | 265,747,137 – 265,747,160 |
|           | GS3-R              | TTCTAGTACCTAGTGCGCCCGTAG          | 2656,81,833 – 265,681,851 |
|           | GS4-F              | AGTAGGCCATAGTACGTAC               | 2656,81,833 – 265,681,851 |
|           | GS4-R              | CTCTTTACCGAGCCCCTACA              | 2656,82,188 – 265,682,208 |
|           | GS5-F              | AGTGGACAACCGAACGAAGA              | 2656,88,987 – 265,689,006 |
|           | GS5-R              | GAAGCAACTATCAACACAAGCCTT          | 2656,89,395 – 265,689,418 |
|           | GS6-F              | TGTTGTTGGTGTGGAGTCG               | 2656,87,243 – 265,687,262 |
|           | GS6-R              | CGTGTGTGTGATCGAATGGT              | 2656,87,542 – 265,687,562 |
|           | GS7-F              | AGCCAGGATCAATGGCATAC              | 2656,78,681 – 265,678,700 |
|           | GS7-R              | AGCAAAGGGCATGTGTTACC              | 2656,78,840 – 265,678,859 |
|           | GS8-F              | GTTAACCATGAGACGGCCAC              | 2656,76,101 – 265,676,121 |
|           | GS8-R              | GTCAGAATCCCCTGCTCG                | 2656,76,713 – 265,676,730 |
| <b>b.</b> | <b>Primer Name</b> | <b>Primer Sequence (5' to 3')</b> | <b>AGPv2 Position</b>     |
|           | FM-F0372           | ACCAGCAAGCAGCAAGAAAT              | 265,681,083 – 265,681,102 |
|           | IM-R0375           | TTGAGTGTCGCCTAGACTGC              | 265,681,658 – 265,681,677 |
|           | RM-R0377           | CCTACTTTTTTCATCTCCCGC             | 265,681,447 – 265,681,466 |
|           | FH-F0378           | CTGCGATGATGCAAGGAGTA              | 265,682,162 – 265,682,181 |
|           | IH-R0379           | CTCAATGCATGCCGTTATTG              | 265,687,383 – 265,687,402 |
|           | RH-R0381           | CGTTGTCGACAGTCTCCTCA              | 265,682,682 – 265,682,700 |

**Supplementary Table 3.** AGPv2 positions of the intervals used in the mixed linear model.

| <b>Interval</b> | <b>AGPv2 Position</b>     |
|-----------------|---------------------------|
| 1               | 197,055,807 – 265,652,616 |
| 2               | 265,652,617 – 265,676,589 |
| 3               | 265,676,590 – 265,682,025 |
| 4               | 265,682,026 – 265,687,993 |
| 5               | 265,687,994 – 265,745,912 |
| 6               | 265,745,913 – 265,746,677 |
| 7               | 265,746,678 – 275,036,633 |

**Supplementary Table 4.** Input values used to perform the HKA tests.

| <b>Loci</b> <sup>a</sup> | <b>S</b> <sup>b</sup> | <b>L</b> <sup>c</sup> | <b>N</b> <sup>d</sup> | <b>K</b> <sup>e</sup> |
|--------------------------|-----------------------|-----------------------|-----------------------|-----------------------|
| AY104395                 | 10                    | 477                   | 11                    | 4.909                 |
| AY106816                 | 39                    | 532                   | 13                    | 37.615                |
| AY107192                 | 13                    | 495                   | 14                    | 6.286                 |
| AY107248                 | 21                    | 538                   | 14                    | 7.286                 |
| AY111546                 | 4                     | 674                   | 15                    | 3.000                 |
| AY111711                 | 26                    | 528                   | 15                    | 13.200                |
| Segment A                | 40                    | 740                   | 16                    | 15.688                |
| Segment B                | 89                    | 1086                  | 16                    | 80.938                |
| Segment C                | 20                    | 1723                  | 15                    | 35.267                |
| Segment D                | 9                     | 1392                  | 16                    | 47.313                |

<sup>a</sup>Six neutral loci and four segments tested in this paper (Fig. 3a).

<sup>b</sup>Number of segregating sites.

<sup>c</sup>Number of total sites excluding gaps.

<sup>d</sup>Sample size.

<sup>e</sup>Average nucleotide difference.

**Supplementary Table 5.** Germplasm assayed for transposon insertions.

| Germplasm Type      | Racename           | Source <sup>a</sup> | Accession     | <i>Tourist</i> <sup>b</sup> | <i>Hopscotch</i> <sup>b</sup> |
|---------------------|--------------------|---------------------|---------------|-----------------------------|-------------------------------|
| Maize Landrace*     | Assiniboine        | NCRPIS              | PI213793      | M                           | M                             |
| Maize Landrace*     | Bolita             | INIFAP              | OAX68         | M                           | M                             |
| Maize Landrace*     | Cateto Sulino      | CIMMYT              | URG II        | M                           | M                             |
| Maize Landrace*     | Chalqueno          | INIFAP              | MEX48         | M                           | M                             |
| Maize Landrace*     | Chapalote          | INIFAP              | SIN2          | M                           | M                             |
| Maize Landrace*     | Conico             | INIFAP              | PUE32         | M                           | M                             |
| Maize Landrace*     | Costeno            | ICA                 | VEN453        | M                           | M                             |
| Maize Landrace*     | Cristalino Norteno | NCGRP               | CHI349        | M                           | M                             |
| Maize Landrace*     | Dzit Bacal         | CIMMYT              | GUA131        | M                           | M                             |
| Maize Landrace*     | Gordo              | CIMMYT              | CHH160        | M                           | M                             |
| Maize Landrace*     | Guirua             | NCGRP               | MAG450        | M                           | M                             |
| Maize Landrace*     | Nal-tel            | INIFAP              | YUC7          | M                           | M                             |
| Maize Landrace*     | Piscorunto         | PCIM                | APC13         | M                           | M                             |
| Maize Landrace*     | Sabanero           | NRC                 | SAN329        | M                           | M                             |
| Maize Landrace*     | Serrano            | INIFAP              | GUA14         | M                           | T                             |
| Maize Landrace*     | Zapalote Chico     | CIMMYT              | OAX70         | M                           | M                             |
| Inbred Teosinte     | Balsas             | JFD                 | TIL01         | T                           | T                             |
| Inbred Teosinte     | Balsas             | JFD                 | TIL02         | T                           | T                             |
| Inbred Teosinte     | Jalisco            | JFD                 | TIL03         | M                           | M                             |
| Inbred Teosinte     | Balsas             | JFD                 | TIL04         | T                           | T                             |
| Inbred Teosinte     | Balsas             | JFD                 | TIL05         | T                           | T                             |
| Inbred Teosinte     | Balsas             | JFD                 | TIL06         | T                           | T                             |
| Inbred Teosinte     | Balsas             | JFD                 | TIL07         | T                           | T                             |
| Inbred Teosinte     | Balsas             | JFD                 | TIL08         | T                           | T                             |
| Inbred Teosinte     | Balsas             | JFD                 | TIL09         | M                           | M                             |
| Inbred Teosinte     | Balsas             | JFD                 | TIL10         | T                           | T                             |
| Inbred Teosinte     | Jalisco            | JFD                 | TIL11         | T                           | T                             |
| Inbred Teosinte     | Balsas             | JFD                 | TIL12         | T                           | T                             |
| Inbred Teosinte     | Jalisco            | JFD                 | TIL14         | T                           | T                             |
| Inbred Teosinte     | Balsas             | JFD                 | TIL16         | T                           | T                             |
| Inbred Teosinte     | Balsas             | JFD                 | TIL17         | M                           | M                             |
| Inbred Teosinte     | Chalco             | JFD                 | TIL18         | T                           | T                             |
| Inbred Teosinte     | Central Plateau    | JFD                 | TIL25         | T                           | T                             |
| Non-inbred Teosinte | Balsas             | CIMMYT              | 8779          | T                           | T                             |
| Non-Inbred Teosinte | Balsas             | INIFAP              | JSG Y LOS-113 | T                           | T                             |
| Non-Inbred Teosinte | Jalisco            | INIFAP              | JSG Y SMH-355 | M                           | M                             |
| Non-Inbred Teosinte | Balsas             | NCRPIS              | PI566688      | T                           | H                             |
| Non-Inbred Teosinte | Balsas             | INIFAP              | JSG Y LOS-172 | T                           | T                             |
| Non-Inbred Teosinte | Balsas             | INIFAP              | JSG-377       | T                           | T                             |
| Non-Inbred Teosinte | Balsas             | INIFAP              | C-9-78        | T                           | T                             |

| Germplasm Type      | Racename | Source <sup>a</sup> | Accession     | <i>Tourist</i> <sup>b</sup> | <i>Hopscotch</i> <sup>b</sup> |
|---------------------|----------|---------------------|---------------|-----------------------------|-------------------------------|
| Non-Inbred Teosinte | Balsas   | CIMMYT              | 11401         | T                           | T                             |
| Non-Inbred Teosinte | Balsas   | INIFAP              | JSG Y LOS-178 | T                           | T                             |
| Non-Inbred Teosinte | Jalisco  | INIFAP              | JSG Y MAS-400 | T                           | T                             |
| Non-Inbred Teosinte | Jalisco  | INIFAP              | JSG Y SMH-352 | T                           | T                             |
| Non-Inbred Teosinte | Balsas   | HHI                 | IC #3         | T                           | T                             |
| Non-Inbred Teosinte | Balsas   | CIMMYT              | 11402         | T                           | T                             |
| Non-Inbred Teosinte | Balsas   | INIFAP              | JSG Y LOS-130 | T                           | T                             |
| Non-Inbred Teosinte | Balsas   | INIFAP              | JSG-379       | T                           | T                             |
| Non-Inbred Teosinte | Balsas   | INIFAP              | C-17-78       | T                           | T                             |
| Non-Inbred Teosinte | Balsas   | INIFAP              | C-14-78       | T                           | T                             |
| Non-Inbred Teosinte | Balsas   | CIMMYT              | 8760          | T                           | T                             |
| Non-Inbred Teosinte | Balsas   | INIFAP              | JSG-378       | T                           | T                             |
| Non-Inbred Teosinte | Balsas   | CIMMYT              | 8763          | T                           | T                             |
| Non-Inbred Teosinte | Balsas   | GWB                 | BK Site 4     | T                           | T                             |
| Non-Inbred Teosinte | Balsas   | CIMMYT              | 11406         | T                           | T                             |
| Non-Inbred Teosinte | Balsas   | CIMMYT              | 11353         | T                           | T                             |
| Non-Inbred Teosinte | Balsas   | INIFAP              | JSG Y LOS-121 | T                           | T                             |
| Non-Inbred Teosinte | Balsas   | CIMMYT              | 8784          | T                           | T                             |
| Non-Inbred Teosinte | Balsas   | INIFAP              | JSG Y LOS-109 | T                           | T                             |
| Non-Inbred Teosinte | Jalisco  | INIFAP              | JSG-203       | T                           | T                             |
| Non-Inbred Teosinte | Jalisco  | BFB                 | 967           | T                           | T                             |
| Non-Inbred Teosinte | Balsas   | INIFAP              | JSG-387       | T                           | T                             |
| Non-Inbred Teosinte | Balsas   | INIFAP              | JSG-193       | T                           | T                             |
| Non-Inbred Teosinte | Balsas   | CIMMYT              | 11357         | T                           | T                             |
| Non-Inbred Teosinte | Balsas   | CIMMYT              | 8762          | T                           | T                             |
| Non-Inbred Teosinte | Balsas   | CIMMYT              | 8783          | T                           | T                             |
| Non-Inbred Teosinte | Balsas   | INIFAP              | JSG-192       | T                           | T                             |
| Non-Inbred Teosinte | Balsas   | INIFAP              | JSG-374       | T                           | T                             |
| Non-Inbred Teosinte | Balsas   | INIFAP              | JSG Y LOS-159 | T                           | T                             |
| Non-Inbred Teosinte | Balsas   | CIMMYT              | 11404         | T                           | T                             |
| Non-Inbred Teosinte | Jalisco  | INIFAP              | JSG Y MAS-264 | T                           | T                             |
| Non-Inbred Teosinte | Balsas   | INIFAP              | JSG-385       | T                           | T                             |
| Non-Inbred Teosinte | Jalisco  | INIFAP              | JSG Y MAS-402 | T                           | T                             |
| Non-Inbred Teosinte | Jalisco  | INIFAP              | JSG Y LOS-43  | T                           | T                             |
| Non-Inbred Teosinte | Balsas   | INIFAP              | JSG Y LOS-161 | T                           | T                             |
| Non-Inbred Teosinte | Jalisco  | INIFAP              | MAS-15        | T                           | T                             |
| Non-Inbred Teosinte | Balsas   | CIMMYT              | 11403         | T                           | T                             |
| Non-Inbred Teosinte | Balsas   | CIMMYT              | 8776          | T                           | T                             |
| Non-Inbred Teosinte | Balsas   | CIMMYT              | 11361         | T                           | H                             |
| Non-Inbred Teosinte | Balsas   | INIFAP              | JSG-197       | T                           | T                             |
| Non-Inbred Teosinte | Balsas   | INIFAP              | JSG Y LOS-120 | T                           | T                             |
| Non-Inbred Teosinte | Balsas   | INIFAP              | JSG-191       | T                           | T                             |



| Germplasm Type      | Racename                | Source <sup>a</sup> | Accession     | <i>Tourist</i> <sup>b</sup> | <i>Hopscotch</i> <sup>b</sup> |
|---------------------|-------------------------|---------------------|---------------|-----------------------------|-------------------------------|
| Non-Inbred Teosinte | Balsas                  | NCRPIS              | PI566686      | T                           | T                             |
| Non-Inbred Teosinte | Jalisco                 | INIFAP              | JSG Y LOS-142 | T                           | T                             |
| Non-Inbred Teosinte | Balsas                  | CIMMYT              | 11355         | T                           | H                             |
| Non-Inbred Teosinte | Balsas                  | INIFAP              | JSG Y LOS-119 | T                           | T                             |
| Non-Inbred Teosinte | Balsas                  | CIMMYT              | 8767          | M                           | M                             |
| Non-Inbred Teosinte | Balsas                  | INIFAP              | JSG Y LOS-176 | T                           | T                             |
| Non-Inbred Teosinte | Jalisco                 | INIFAP              | JSG Y LOS-40  | T                           | T                             |
| Non-Inbred Teosinte | Balsas                  | INIFAP              | JSG-382       | T                           | T                             |
| Non-Inbred Teosinte | Jalisco                 | CIMMYT              | 9477          | T                           | T                             |
| Non-Inbred Teosinte | Balsas                  | CIMMYT              | 11388         | T                           | T                             |
| Non-Inbred Teosinte | Balsas                  | INIFAP              | JSG-187       | T                           | T                             |
| Non-Inbred Teosinte | Balsas                  | CIMMYT              | 8759          | T                           | T                             |
| Non-Inbred Teosinte | Balsas                  | CIMMYT              | 8782          | T                           | T                             |
| Non-Inbred Teosinte | Balsas                  | CIMMYT              | 11376         | T                           | T                             |
| Non-Inbred Teosinte | Balsas                  | INIFAP              | JSG-391       | T                           | T                             |
| Non-Inbred Teosinte | Balsas                  | CIMMYT              | 8766          | T                           | T                             |
| Non-Inbred Teosinte | Balsas                  | NCRPIS              | PI566691      | T                           | T                             |
| Non-Inbred Teosinte | Balsas                  | CIMMYT              | 8765          | T                           | T                             |
| Non-Inbred Teosinte | Jalisco                 | INIFAP              | JSG Y LOS-74  | T                           | T                             |
| Non-Inbred Teosinte | Balsas                  | NCRPIS              | PI384064      | T                           | T                             |
| Non-Inbred Teosinte | Jalisco                 | INIFAP              | JSG Y MAS-401 | T                           | T                             |
| Non-Inbred Teosinte | Balsas                  | INIFAP              | JSG Y LOS-126 | T                           | T                             |
| Non-Inbred Teosinte | Balsas                  | CIMMYT              | 8761          | T                           | T                             |
| Non-Inbred Teosinte | Balsas                  | CIMMYT              | 11407         | T                           | T                             |
| Non-Inbred Teosinte | Balsas                  | CIMMYT              | 8758          | T                           | T                             |
| Inbred Teosinte     | Balsas                  | JFD                 | TIL15         | T                           | T                             |
| Maize Landrace      | Arrocillo Amarillo      | INIFAP              | VER 311       | M                           | M                             |
| Maize Landrace      | Aysuma                  | ICA                 | BOV 331       | M                           | M                             |
| Maize Landrace      | Canilla                 | ICA                 | VEN 604       | M                           | M                             |
| Maize Landrace      | Capia Blanco            | CIMMYT              | ARG 499       | M                           | M                             |
| Maize Landrace      | Cariaco                 | NRC                 | COR 334       | M                           | M                             |
| Maize Landrace      | Cateto Nortista Precoce | CIMMYT              | SUR I         | M                           | M                             |
| Maize Landrace      | Cateto Sulino           | CIMMYT              | URG II        | M                           | M                             |
| Maize Landrace      | Chalqueno               | INIFAP              | MEX 48        | M                           | M                             |
| Maize Landrace      | Chillo                  | NRC                 | ECU 458       | M                           | M                             |
| Maize Landrace      | Chococeno               | ICA                 | ECU 964       | M                           | M                             |
| Maize Landrace      | Conejo                  | INIFAP              | GRO 157       | M                           | M                             |
| Maize Landrace      | Confite Puneno          | PCIM                | PUN 4         | M                           | M                             |
| Maize Landrace      | Conico                  | INIFAP              | PUE 109       | M                           | M                             |
| Maize Landrace      | Conico                  | INIFAP              | MEX 108       | M                           | M                             |
| Maize Landrace      | Coroico                 | ICA                 | BOV 992       | M                           | M                             |
| Maize Landrace      | Cuban Flint             | CIMMYT              | CUB 63        | M                           | M                             |

| Germplasm Type  | Racename             | Source <sup>a</sup> | Accession | <i>Tourist</i> <sup>b</sup> | <i>Hopscotch</i> <sup>b</sup> |
|-----------------|----------------------|---------------------|-----------|-----------------------------|-------------------------------|
| Maize Landrace  | Dente Paulista       | CIMMYT              | SP III    | M                           | M                             |
| Maize Landrace  | Dulce de Jalisco     | INIFAP              | ZAC 182   | M                           | M                             |
| Maize Landrace  | Dzit Bacal           | CIMMYT              | GUA 130   | M                           | M                             |
| Maize Landrace  | Dzit Bacal           | INIFAP              | QOO 20    | M                           | M                             |
| Maize Landrace  | Guirua               | NCGRP               | MAG 443   | M                           | M                             |
| Maize Landrace  | Harinoso Tarapaqueno | NRC                 | CHI 421   | M                           | M                             |
| Maize Landrace  | Imbricado            | ICA                 | CUN 372   | M                           | M                             |
| Maize Landrace  | Jala                 | CIMMYT              | JAL 44    | M                           | M                             |
| Maize Landrace  | Karapampa            | NRC                 | BOV 961   | M                           | M                             |
| Maize Landrace  | Kculli               | PCIM                | CUZ 66    | M                           | M                             |
| Maize Landrace  | Montana              | ICA                 | NAR 426   | M                           | M                             |
| Maize Landrace  | morado               | ICA                 | BOV 567   | M                           | M                             |
| Maize Landrace  | motozinteco          | INIFAP              | CHS 650   | M                           | M                             |
| Maize Landrace  | mushito              | INIFAP              | MIC 328   | M                           | M                             |
| Maize Landrace  | Nal-tel              | INIFAP              | CAM 48    | M                           | M                             |
| Maize Landrace  | Nal-tel              | INIFAP              | YUC 148   | M                           | H                             |
| Maize Landrace  | Nal-tel de Altura    | INIFAP              | CHS 196   | M                           | M                             |
| Maize Landrace  | Onaveno              | INIFAP              | SON 105   | H                           | M                             |
| Maize Landrace  | Pepitilla            | INIFAP              | MOR 99    | M                           | M                             |
| Maize Landrace  | Pira                 | ICA                 | VEN 485   | M                           | M                             |
| Maize Landrace  | Piscorunto           | PCIM                | APC 13    | M                           | M                             |
| Maize Landrace  | Sabanero             | NRC                 | SAN 329   | M                           | M                             |
| Maize Landrace  | Serrano              | INIFAP              | GUA 14    | M                           | H                             |
| Maize Landrace  | Serrano Mixe         | INIFAP              | OAX 565   | T                           | M                             |
| Maize Landrace  | Tablilla de Ocho     | CIMMYT              | NAY 185   | M                           | M                             |
| Maize Landrace  | Tuson                | INIFAP              | TRN 10    | M                           | M                             |
| Maize Landrace  | Tuxpeno Norteno      | INIFAP              | COA 21    | M                           | M                             |
| Maize Landrace  | Tuxpeno Norteno      | INIFAP              | CHH 121   | M                           | M                             |
| Inbred Landrace | Araguito             | NCRPIS              | MR01      | M                           | M                             |
| Inbred Landrace | Assiniboine          | NCRPIS              | MR02      | T                           | M                             |
| Inbred Landrace | Bolita               | NCRPIS              | MR03      | M                           | M                             |
| Inbred Landrace | Cateto               | NCRPIS              | MR05      | M                           | M                             |
| Inbred Landrace | Chapalote            | NCRPIS              | MR06      | M                           | M                             |
| Inbred Landrace | Comiteco             | NCRPIS              | MR07      | M                           | M                             |
| Inbred Landrace | Costeno              | NCRPIS              | MR08      | M                           | M                             |
| Inbred Landrace | Cravo Riogranense    | NCRPIS              | MR09      | M                           | M                             |
| Inbred Landrace | Cristalino Norteno   | NCRPIS              | MR10      | M                           | M                             |
| Inbred Landrace | Cuban Flint          | NCRPIS              | MR11      | M                           | M                             |
| Inbred Landrace | Havasupai            | NCRPIS              | MR12      | M                           | M                             |
| Inbred Landrace | Hickory King         | NCRPIS              | MR13      | M                           | M                             |
| Inbred Landrace | Longfellow Flint     | NCRPIS              | MR14      | M                           | M                             |
| Inbred Landrace | Pisankalla           | NCRPIS              | MR17      | M                           | M                             |

| Germplasm Type  | Racename       | Source <sup>a</sup> | Accession | <i>Tourist</i> <sup>b</sup> | <i>Hopscotch</i> <sup>b</sup> |
|-----------------|----------------|---------------------|-----------|-----------------------------|-------------------------------|
| Inbred Landrace | Reventador     | NCRPIS              | MR18      | M                           | M                             |
| Inbred Landrace | Santa Domingo  | NCRPIS              | MR19      | T                           | M                             |
| Inbred Landrace | Shoe Peg       | NCRPIS              | MR20      | M                           | M                             |
| Inbred Landrace | Tabloncillo    | NCRPIS              | MR21      | M                           | M                             |
| Inbred Landrace | Tuxpeno        | NCRPIS              | MR22      | M                           | M                             |
| Inbred Landrace | Zapalote Chico | NCRPIS              | MR23      | M                           | M                             |
| Inbred Landrace | Chullpi        | NCRPIS              | MR24      | M                           | M                             |
| Inbred Landrace | Pororo         | NCRPIS              | MR25      | M                           | M                             |
| Inbred Landrace | Pollo          | NCRPIS              | MR26      | M                           | M                             |
| Maize Inbred    |                | NCRPIS              | B73       | M                           | M                             |
| Maize Inbred    |                | NCRPIS              | Mo17      | M                           | M                             |
| Maize Inbred    |                | NCRPIS              | B97       | M                           | M                             |
| Maize Inbred    |                | NCRPIS              | CML52     | M                           | M                             |
| Maize Inbred    |                | NCRPIS              | CML69     | M                           | M                             |
| Maize Inbred    |                | NCRPIS              | CML103    | M                           | M                             |
| Maize Inbred    |                | NCRPIS              | CML228    | M                           | M                             |
| Maize Inbred    |                | NCRPIS              | CML247    | M                           | M                             |
| Maize Inbred    |                | NCRPIS              | CML277    | M                           | M                             |
| Maize Inbred    |                | NCRPIS              | CML322    | M                           | M                             |
| Maize Inbred    |                | NCRPIS              | CML333    | M                           | M                             |
| Maize Inbred    |                | NCRPIS              | Hp301     | M                           | M                             |
| Maize Inbred    |                | NCRPIS              | Il14H     | M                           | M                             |
| Maize Inbred    |                | NCRPIS              | Ki3       | M                           | M                             |
| Maize Inbred    |                | NCRPIS              | Ki11      | M                           | M                             |
| Maize Inbred    |                | NCRPIS              | Ky21      | M                           | M                             |
| Maize Inbred    |                | NCRPIS              | M37W      | M                           | M                             |
| Maize Inbred    |                | NCRPIS              | M162W     | M                           | M                             |
| Maize Inbred    |                | NCRPIS              | MO18W     | M                           | M                             |
| Maize Inbred    |                | NCRPIS              | MS71      | M                           | M                             |
| Maize Inbred    |                | NCRPIS              | NC350     | M                           | M                             |
| Maize Inbred    |                | NCRPIS              | NC358     | M                           | M                             |
| Maize Inbred    |                | NCRPIS              | Oh7B      | M                           | M                             |
| Maize Inbred    |                | NCRPIS              | Oh43      | M                           | M                             |
| Maize Inbred    |                | NCRPIS              | P39       | M                           | M                             |
| Maize Inbred    |                | NCRPIS              | Tx303     | M                           | M                             |
| Maize Inbred    |                | NCRPIS              | Tzi8      | M                           | M                             |
| Maize Inbred    |                | NCRPIS              | W22       | M                           | M                             |

\* Maize landrace made haploid for DNA extraction and sequencing.

<sup>a</sup> Source information can be found at [www.panzea.org](http://www.panzea.org).

<sup>b</sup> "M" denotes the common maize haplotype (presence of the element), "T" denotes the common teosinte haplotype (absence of the element).
